# Supplementary material
Source: ML conference proceedings conference paper supplement (https://openreview.net/forum?id=6lnoUqFd5R)
Supplement: supplementary_material [file attachment]

443 **A Numerical example of the EF problem**

444

445

446

447

448

449

450

451

452

453

454

455

456

457

458

459

460

461

462

463

464

465

466

$$\mathbf{A} = \begin{bmatrix} 1 & 0 & 0 & 0 \\ 0 & 1 & 0 & 0 \\ 0 & 0 & 1 & 0 \\ 0 & 0 & 0 & 1 \\ -1 & 0 & 0 & 0 \\ 0 & -1 & 0 & 0 \\ 0 & 0 & -1 & 0 \\ 0 & 0 & 0 & -1 \\ -1 & -1 & -1 & -1 \\ 1 & 1 & 1 & 1 \\ 1 & 1 & 0 & 0 \\ 0 & 0 & 1 & 1 \end{bmatrix} \quad \mathbf{B} = \begin{bmatrix} 0.591 \\ 0.749 \\ 0.412 \\ 0.545 \\ 0. \\ 0. \\ 0. \\ 0. \\ -0.81 \\ 1. \\ 0.74 \\ 0.58 \end{bmatrix} \quad (12)$$

$$\mathbf{C} = [0, 0, 1, 1]; \zeta_{\text{MAX}} = [0.74, 0.58]$$

$$\mathbf{X}_{\text{MAX}} = [0.591, 0.749, 0.412, 0.545]$$

$$\mathbf{X}_{\text{MIN}} = [0, 0, 0, 0]$$

$$\alpha_{\text{MIN}} = 0.81, \alpha_{\text{MAX}} = 1$$

$\mathbf{E} \in \mathbb{R}^{[n+1, n]}$  is built by stacking  $\mathbf{Q}'$  and  $[0, \dots, 0]$  such that  $\mathbf{F} \in \mathbb{R}^{[n+1, 1]} = [\sqrt{\mathcal{V}_{\text{target}}}, 0, \dots]$ . Then, eq. 2 can be reformulated as follow:

$$\phi := \text{minimize } -\mathbf{R}^\top \mathbf{x} \text{ subject to } \mathbf{A} \leq \mathbf{B} \text{ and } \mathbf{E} \leq \mathbf{F}. \quad (13)$$

467 The complete optimal allocation of eq. 3 can be summarized by the following python script:

```

"""EF evaluation """
import copy
import logging
import os

import cvxopt
import numpy as np

scalar = 10000

def cvxopt_solve_qp(P, q, G=None, h=None, **kwargs):
    P = 0.5 * (P + P.T) # make sure P is symmetric
    args = [cvxopt.matrix(P), cvxopt.matrix(q)]
    if G is not None:
        args.extend([cvxopt.matrix(G), cvxopt.matrix(h)])
    sol = cvxopt.solvers.qp(*args, **kwargs)
    if sol["status"] != "optimal":
        raise ValueError("QP SOLVER: sol.status != 'optimal'")
    return np.array(sol["x"]).reshape((P.shape[1]),), num_iterations

def cvxopt_solve_socp(c, G1, h1, Gq, hq, **kwargs):
    args = [cvxopt.matrix(c), cvxopt.matrix(G1), cvxopt.matrix(h1), [cvxopt.matrix(Gq)],
    ↪ [cvxopt.matrix(hq)]]
    sol = cvxopt.solvers.socp(*args, **kwargs)
    num_iterations = sol["iterations"]
    if sol["status"] != "optimal":
        raise ValueError("SOCP SOLVER: sol.status != 'optimal'")
    return np.array(sol["x"]).reshape((G1.shape[1]),), num_iterations

def efficient_frontier(max_weights, vol_target, conditions, condition_max, vol, ret, correl):
    n_assets = len(max_weights)
    min_weights = [0] * n_assets
    v_t = vol_target * vol_target * scalar
    G = np.vstack([np.eye(n_assets), -np.eye(n_assets), conditions])
    H = np.hstack([max_weights, min_weights, condition_max])
    cov = scalar * np.matmul(np.matmul(np.diag(vol), correl), np.diag(vol))
    wt = cvxopt_solve_qp(cov, np.zeros_like(ret), G, H) #eq 1
    wt = np.minimum(list(np.maximum(list(wt), min_weights)), max_weights)
    wtld = wt.reshape([n_assets, 1])

```

We provide a numerical example of the EF problem in the case of a 4-asset problem with 2 classes and  $\alpha_{\text{MIN}} < 1$  (see Eq.12). Only the constraints are presented here. It is important to note that the matrices  $\mathbf{A}$  and  $\mathbf{B}$  representing all  $w$  constraints grow in size by  $(2n + 2 + m)$  as  $n$  increases, where  $m$  is the number of distinct asset classes. If  $\mathbf{X}_{\text{MAX}}$  is not defined, then all entries of  $\mathbf{X}_{\text{MAX}}$  can be set to  $\alpha_{\text{MAX}}$ . Solving Eq.1 is achieved by directly considering  $\mathbf{A}$  and  $\mathbf{B}$  and the covariance matrix  $\mathbf{Q} = \text{diag}(\mathbf{V})\mathbf{P}\text{diag}(\mathbf{V})$  obtained from the other inputs. If  $\mathcal{V}_{\text{min}} = \mathbf{x}^\top \mathbf{Q} \mathbf{x}$ , then we solve a second-order cone program (SOCP) to increase the portfolio's volatility without exceeding  $\mathcal{V}_{\text{target}}$  and get better returns.

We obtain the volatility constraint through the Cholesky decomposition of the covariance matrix  $\mathbf{Q}' = \mathbf{L}(\mathbf{Q})\mathbf{L}(\mathbf{Q})^\top$  where  $\mathbf{L}$  is the lower-triangular operator.

```

variance = np.matmul(np.matmul(wt1d.T, cov), wt1d)[0, 0]
if variance < v_t:
    ret = np.array(ret)
    chol = np.linalg.cholesky(cov).T
    Gq = np.vstack([np.zeros(n_assets), chol])
    hq = np.zeros(n_assets + 1)
    hq[0] = np.sqrt(v_t)
    wt = cvxopt_solve_socp(-ret, G1=G, h1=H, Gq=Gq, hq=hq) #eq 2
    wt = np.minimum(list(np.maximum(list(wt), min_weights)), max_weights)
return wt

```

## 468 B Preprocessing

469 We encounter ambiguity in optimization problems due to various combinations of inputs  
470 representing the same problem. To address this, we provide three examples where we discuss  
471 the ambiguity and propose a standardized solution for processing inputs in an optimized  
472 manner prior to token projection.

473 When the  $i$ -th asset belongs to the  $j$ -th asset class and  $x_i^{\text{MAX}} > \zeta_{c_j}$ , the constraint  $x_i^{\text{MAX}}$  is  
474 overridden by  $\zeta_{c_j}$ . This means that there is no combination of assets where the allocation of  
475 the  $i$ -th asset can be higher than  $\zeta_{c_j}$ . To address this constraint, we clip  $x_i^{\text{MAX}}$  to  $\zeta_{c_j}$  by using  
476 the formula:  $x_i^{\text{MAX}} = \min(\max(x_i^{\text{MAX}}, \zeta_{c_j}), 0)$  for all  $i$ -th assets belonging to the  $j$ -th class.

477 The remaining two cases are additional edge cases related to the previous condition. If only  
478 one asset is assigned to the  $j$ -th class,  $\zeta_{c_j}$  and  $x_j^{\text{MAX}}$  should be equal because it is equivalent  
479 to having no class constraint for that class. Also, if a class constraint is set but no assets  
480 belong to that class, it is equivalent to setting  $\zeta_{c_j} = 0$ . By processing the optimization inputs  
481 in this manner, we ensure that any ambiguity on the class constraints are standardized,  
482 allowing for equivalent linear projections into token before the transformer encoder part of  
483 the network.

## 484 C Experimental Section

### 485 C.1 Dataset

| Dataset name                 | Size         | Description                                   |
|------------------------------|--------------|-----------------------------------------------|
| $\mathcal{D}_{\text{train}}$ | 1.2B samples | Sampled at random over the domain in table. 1 |
| $\mathcal{D}_{\text{test}}$  | 990K samples | Sampled at random over the domain in table. 1 |
| $\mathcal{D}_{\text{ood}}$   | 990K samples | Sampled following the indication of sec. 4.3  |

Table 5: Description of the dataset used

486 The size and description of the dataset we used are presented in table. 5. We used an  
487 asymmetric weighting scheme to generate all datasets, favoring more complex optimizations  
488 (see Table 6). As the number of assets increases, the number of unstable regions also increases,  
489 where allocation can significantly change. To ensure training and evaluation encompass these  
490 unstable regions, we generated a higher proportion of optimization inputs with more assets.

### 491 C.2 Accuracy with half-precision floating-point format

492 The results obtained using single-precision floating-point (FP32) and the model quantized to  
493 half-precision floating-point (FP16) are on the same order of accuracy as shown in table 7  
494 and fig. 10. The quantization process to FP16 maintains the necessary precision for the  
495 calculations, resulting in equivalent outcomes as the FP32 counterpart. While a degradation  
496 in the ability to rank assets<sup>5</sup> and respect the volatility and class constraint occurs, we  
497 observe that this does not impact the overall distributional properties and the downstream

<sup>5</sup>The ranking of the results has been computed with a tolerance of  $1e-4$ , where a slight deviations are permissible and don't hurt the accuracy. This was made such that negligible allocation made by NeuralEF which can be disregarded for practical purpose are neglected.

| Asset case | Proportion (%) |
|------------|----------------|
| 2          | 2.517          |
| 3          | 2.551          |
| 4          | 2.559          |
| 5          | 2.603          |
| 6          | 6.834          |
| 7          | 6.879          |
| 8          | 10.346         |
| 9          | 10.377         |
| 10         | 13.826         |
| 11         | 13.850         |
| 12         | 27.658         |

Table 6: Proportion of asset in each datasets.

498 application that would benefit from it. As such, there is no discrepancy in the results between  
499 the two representations, demonstrating the viability of using the lower-precision FP16 for  
500 computational efficiency.

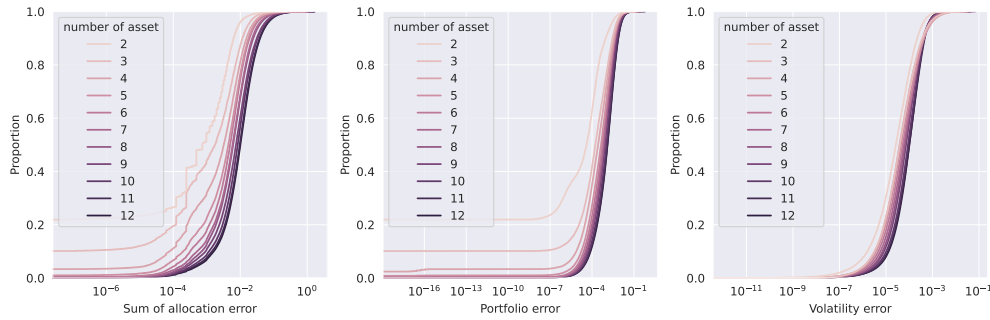

Figure 10: Cumulative distributions of the sum of absolute allocation error of allocations and portfolio returns per assets for the FP16 quantized NeuralEF.

| Asset case | Portfolio weights MSE | Portfolio weights MAE | 95 quantile | 99.865 quantile | 99.997 quantile | Ranking precision             |
|------------|-----------------------|-----------------------|-------------|-----------------|-----------------|-------------------------------|
| 2          | 9.54e-07              | 9.77e-04              | 1.25e-02    | 3.37e-02        | 1.09e-01        | 93.012 %                      |
| 3          | 7.95e-08              | 1.63e-04              | 1.51e-02    | 3.78e-02        | 1.06e-01        | 98.394 %                      |
| 4          | 6.85e-07              | 5.34e-04              | 1.65e-02    | 4.59e-02        | 1.39e-01        | 97.231 %                      |
| 5          | 2.52e-06              | 1.25e-03              | 1.48e-02    | 4.08e-02        | 1.77e-01        | 94.064 %                      |
| 6          | 1.94e-05              | 2.00e-03              | 1.51e-02    | 4.28e-02        | 1.68e-01        | 89.798 %                      |
| 7          | 2.84e-06              | 1.19e-03              | 1.67e-02    | 4.50e-02        | 1.95e-01        | 85.224 %                      |
| 8          | 1.06e-05              | 2.40e-03              | 1.61e-02    | 4.49e-02        | 1.57e-01        | 81.598 %                      |
| 9          | 7.72e-06              | 1.65e-03              | 1.99e-02    | 5.20e-02        | 2.08e-01        | 77.217 %                      |
| 10         | 1.16e-05              | 2.21e-03              | 2.00e-02    | 5.25e-02        | 1.71e-01        | 74.899 %                      |
| 11         | 1.11e-05              | 1.72e-03              | 2.22e-02    | 5.85e-02        | 2.36e-01        | 71.646 %                      |
| 12         | 3.48e-08              | 1.30e-04              | 1.98e-02    | 5.31e-02        | 2.11e-01        | 68.804 %                      |
|            | Portfolio return MSE  | Portfolio return MAE  | 95 quantile | 99.865 quantile | 99.997 quantile | $\zeta_{\max}$ precision      |
| 2          | 2.69e-06              | 1.64e-03              | 7.87e-03    | 2.26e-02        | 6.98e-02        | 97.555 %                      |
| 3          | 9.48e-06              | 3.08e-03              | 1.24e-02    | 3.19e-02        | 1.12e-01        | 90.949 %                      |
| 4          | 3.58e-06              | 1.89e-03              | 1.48e-02    | 4.05e-02        | 1.77e-01        | 87.576 %                      |
| 5          | 8.79e-06              | 2.96e-03              | 1.49e-02    | 3.57e-02        | 9.32e-02        | 86.583 %                      |
| 6          | 1.60e-13              | 3.99e-07              | 1.52e-02    | 3.58e-02        | 1.21e-01        | 85.592 %                      |
| 7          | 2.15e-09              | 4.63e-05              | 1.68e-02    | 3.94e-02        | 1.51e-01        | 82.323 %                      |
| 8          | 5.74e-06              | 2.40e-03              | 1.72e-02    | 4.25e-02        | 1.49e-01        | 84.808 %                      |
| 9          | 2.11e-06              | 1.45e-03              | 2.13e-02    | 5.19e-02        | 1.74e-01        | 83.589 %                      |
| 10         | 2.38e-09              | 4.88e-05              | 2.31e-02    | 5.36e-02        | 1.55e-01        | 83.707 %                      |
| 11         | 1.31e-07              | 3.62e-04              | 2.49e-02    | 5.75e-02        | 1.75e-01        | 83.190 %                      |
| 12         | 1.28e-06              | 1.13e-03              | 2.49e-02    | 5.75e-02        | 1.84e-01        | 83.197 %                      |
|            | Volatility return MSE | Volatility return MAE | 95 quantile | 99.865 quantile | 99.997 quantile | $V_{\text{target}}$ precision |
| 2          | 2.69e-06              | 1.64e-03              | 7.87e-03    | 2.26e-02        | 6.98e-02        | 87.649 %                      |
| 3          | 9.48e-06              | 3.08e-03              | 1.24e-02    | 3.19e-02        | 1.12e-01        | 81.729 %                      |
| 4          | 3.58e-06              | 1.89e-03              | 1.48e-02    | 4.05e-02        | 1.77e-01        | 83.229 %                      |
| 5          | 8.79e-06              | 2.96e-03              | 1.49e-02    | 3.57e-02        | 9.32e-02        | 79.704 %                      |
| 6          | 1.60e-13              | 3.99e-07              | 1.52e-02    | 3.58e-02        | 1.21e-01        | 80.056 %                      |
| 7          | 2.15e-09              | 4.63e-05              | 1.68e-02    | 3.94e-02        | 1.51e-01        | 80.270 %                      |
| 8          | 5.74e-06              | 2.40e-03              | 1.72e-02    | 4.25e-02        | 1.49e-01        | 76.472 %                      |
| 9          | 2.11e-06              | 1.45e-03              | 2.13e-02    | 5.19e-02        | 1.74e-01        | 77.205 %                      |
| 10         | 2.38e-09              | 4.88e-05              | 2.31e-02    | 5.36e-02        | 1.55e-01        | 79.268 %                      |
| 11         | 1.31e-07              | 3.62e-04              | 2.49e-02    | 5.75e-02        | 1.75e-01        | 81.682 %                      |
| 12         | 1.28e-06              | 1.13e-03              | 2.49e-02    | 5.75e-02        | 1.84e-01        | 79.517 %                      |

Table 7: Accuracy of portfolio weights, implied return and resulting volatility for the FP16 quantized NeuralEF.
